# Supplementary material
Source: ML conference proceedings conference paper supplement (https://openreview.net/forum?id=HYka22IcV6)
Supplement: supplementary_material [file attachment]

## A Full Regret Proof

### A.0 Outline of Proof

1. Reduce path planner to linear dynamical systems model
2. Demonstrate that a general instance of Alg. 2 is a trust region problem
3. Reduce Eqn. 9 in Alg. 1 to an instance of Alg. 2
4. Justify necessary analogous quantities in our problem to those of the proofs in [38, 36]
5. Apply the results for Nonconvex FPL with Memory from [38] to Alg. 1 to obtain the regret bound

### A.1 Reduction of Path Planned case to Standard Controls case

Assume that the planner devises a nominal path (denoted with a  $(\bar{\cdot})^0$  notation) in coordinates  $\mathbf{x}$  and inputs  $\mathbf{u}$ : so the path  $\mathcal{P}$  is fully specified as  $\mathcal{P} = \{\bar{\mathbf{x}}_t^0, \bar{\mathbf{u}}_t^0\}_{t=0}^T$ . Assume that the path is chosen so that at every  $\mathbf{x}$  on or near the path, the following dynamics hold around perturbations of the path:

$$\mathbf{x}_t - \bar{\mathbf{x}}_t^0 = A(\mathbf{x}_{t-1} - \bar{\mathbf{x}}_{t-1}^0) + B(\mathbf{u}_{t-1} - \bar{\mathbf{u}}_{t-1}^0) + D\mathbf{w}_{t-1}. \quad (10)$$

Using this change of coordinates, we can essentially negate the path and study the relevant perturbation dynamics  $\delta\mathbf{x}_t := \mathbf{x}_t - \bar{\mathbf{x}}_t^0$  and  $\delta\mathbf{u}_t := \mathbf{u}_t - \bar{\mathbf{u}}_t^0$ , we recover the desired equation:

$$\delta\mathbf{x}_t = A\delta\mathbf{x}_{t-1} + B\delta\mathbf{u}_{t-1} + D\mathbf{w}_{t-1}. \quad (11)$$

For shorthand, we will define  $\mathbf{x} := \delta\mathbf{x}$  and  $\mathbf{u} = \delta\mathbf{u}$  to ease exposition, remembering that they represent perturbations from the nominal path. Intuitively, this is a reasonable model for ‘quasi-static’ systems (e.g., a drone or car or aircraft using path planning for non-aggressive maneuvers).

### A.2 Algorithm 2 is a Trust Region Solver

The proof that Alg. 2 is a trust region solver is given in Supp. B.1- B.3.

### A.3 Algorithm 2 Solves Equation 9

The proof that Eqn. 9 is a special instance of admissible arguments to Alg. 2 is shown in Supp. B.4.

### A.4 Technical Notes

#### A.4.1 Continuity and Conditioning Parameters

We begin with an analysis of the Lipschitz constant for the approximate cost functions (this will follow a similar path to [38]).

First, note that the diameter of the decision set is  $2D_M$  and that the gradient of the quadratic cost above is  $\nabla_{\mathbf{m}}\ell_t = (P + P^T)\mathbf{m} + \mathbf{p}$ . As such,

$$\begin{aligned} L &:= \max_{\mathbf{m}, t} \{\|\nabla_{\mathbf{m}}\ell_t(\mathbf{m})\|_\infty\} \\ &\leq \max_{\mathbf{m}, t} \{(\|P\|_1 + \|P\|_\infty)D_M + \|\mathbf{p}\|_\infty\} \\ &\leq 2Hd_wRD + R \end{aligned}$$

We consider as well a bound on the conditioning number of the optimization problem. Because the size of the optimization grows linearly in time, the condition number grows at most linearly as well. Therefore, the run-time of the algorithm is polynomial (neither the condition number nor the dimension grows too rapidly).

Finally, we note bounds on the elements of  $P$  and  $\mathbf{p}$  in the trust region instance. The bounds on costs, states, inputs, and disturbances together imply that the elements of  $P_t$  are bounded by  $C_u^2\kappa^2\xi$ , and the elements of  $\mathbf{p}$  are bounded by  $C_u^2\kappa^2\xi\beta$  (this again follows [38]).

## 511 A.4.2 Truncated State Approximation

512 The idea of this proof follows directly from [38]; however, we show the proof in detail because in  
513 our case the truncated state history affects the resulting vectors  $\mathbf{a}_j$  in the optimization, leading to a  
514 different instantiation of the problem.

515 To give a sense of the added subtlety for obstacle avoidance, observe that in certain scenarios, small  
516 perturbations in the observed relative obstacle positions could yield large changes in the optimal  
517 policy. For example, imagine that there is one obstacle, located directly on the centerline of the  
518 nominal planned motion. Then a small perturbation of the obstacle to the right makes the optimal  
519 action “Left,” while a small perturbation of the obstacle to the left makes the optimal action “Right.”

520 This phenomenon is not a problem in the regret outline because, while the optimal decision is fragile,  
521 the loss incurred of choosing incorrectly is bounded by the quadratic (and therefore, continuous)  
522 nature of the cost functions themselves.

523 For the dynamics and control we have assumed that

$$\begin{aligned} x_{t+1} &= Ax_t + Bu_t + Dw_t \\ \mathbf{u}_t &= K\mathbf{x}_t + \mathbf{b}_t + M_t\tilde{\mathbf{w}}_t \\ &= K\mathbf{x}_t + \sum_{i=1}^H M_t^{[i]}\mathbf{w}_{t-i}, \end{aligned} \tag{12}$$

524 where the bias is included by one-padding the disturbance vector. For simplicity we will omit the  
525 explicit bias from ensuing analysis; in all cases it can be understood to be incorporated into the  
526 measured disturbance. We can then show (as in [38]) that the state can be expressed as the sum of  
527 disturbance-to-state transfer function matrices  $\Psi_{t,i}$ :

$$\begin{aligned} \mathbf{x}_{t+1}^A &= \tilde{A}^{H+1}\mathbf{x}_{t-H}^A + \sum_{i=0}^{2H} \Psi_{t,i}\mathbf{w}_{t-i}, \text{ where} \\ \tilde{A} &= A + BK \text{ and} \\ \Psi_{t,i} &= \tilde{A}^i D \mathbb{1}[i \leq H] + \sum_{j=0}^H \tilde{A}^j B M_{t-j}^{[i-j]} \mathbb{1}[i-j \in \{1, \dots, H\}]. \end{aligned}$$

528 We define the state estimate and cost as

$$\begin{aligned} \mathbf{y}_{t+1} &:= \sum_{i=0}^{2H} \Psi_{t,i}\mathbf{w}_{t-i} \\ \ell_t(M_{t-H:t}) &= c_t(\mathbf{y}_{t+1}(M_{t-H:t}), \tilde{\mathbf{u}}_t) \end{aligned}$$

529 where  $\tilde{\mathbf{u}}_t = M_t\tilde{\mathbf{w}}_t$  (the residual input on top of the closed-loop controller).

530 Now, assume that  $\|\tilde{A}\| \leq 1 - \gamma$ , that  $\|\tilde{A}\|, \|B\|, \|D\|, \|K\| \leq \beta$ , and that for all  $t$  it holds that  
531  $\|w_t\| \leq C_w$ ,  $\|u_t\| \leq C_u$ , and  $\|Q_t\|, \|R_t\| \leq \xi$ . Then we can show that the approximation error of  
532 the costs is sufficiently small. Let the condition number be defined as  $k = \|\tilde{A}\| \|\tilde{A}^{-1}\|$ .

## 533 A.4.3 Bounding the States Along a Trajectory

534 Note that  $\tilde{\mathbf{u}}_t = M_t\tilde{\mathbf{w}}_t$ ; this implies that  $\|\tilde{\mathbf{u}}_t\| \leq HDC_w$ . This implies further that  $\|B\tilde{\mathbf{u}}_t + D\mathbf{w}_t\| \leq$   
535  $2\beta HDC_w$  by the triangle inequality. Assuming that there exists  $\tau$  such that

$$\|\mathbf{x}_\tau\|_2 \leq \frac{2\beta HDC_w}{\gamma},$$

536 we have that for every  $t > H + \tau + 1$ ,  $\|\mathbf{x}_{t-H-1}^A\|_2 \leq \frac{2\beta HDC_w}{\gamma}$ . (WLOG, we can assume the initial  
537 state  $\mathbf{x}_0$  is bounded in this domain - that is, that the assumption is satisfied with  $\tau = 0$ ; the region  
538 defined above is the long-term reachable set of the state  $\mathbf{x}_t$  driven by bounded disturbances  $\mathbf{w}_t$   
539 and (implicitly bounded) residual inputs  $\tilde{\mathbf{u}}_t$  [the norm is limited by the stability parameter  $\gamma$  of the  
540 closed-loop  $\tilde{A}$ -matrix]).

#### 541 A.4.4 Bounding the Change in Costs

Now, we analyze the change in costs

$$|c_t(\mathbf{x}_{t+1}^A, \tilde{\mathbf{u}}_t) - \ell_t(M_{t-H:t})| = \left| \min_{j \in [p]} \|\mathbf{a}_{j,t} + BM_t \tilde{\mathbf{w}}_t\|_2^2 - \min_{j \in [p]} \|\hat{\mathbf{a}}_{j,t} + BM_t \tilde{\mathbf{w}}_t\|_2^2 \right|$$

542 Noting the definition of  $\hat{\mathbf{a}}_{j,t}$  and of  $\mathbf{a}_{j,t}$ , we can bound the difference between them as a function of  
 543 the error in approximation of  $\mathbf{x}_t$  (see [38]):

$$\begin{aligned} \mathbf{a}_{j,t} &:= \mathbf{p}_{j,t} - \mathbf{x}_t \\ \implies \hat{\mathbf{a}}_{j,t} - \mathbf{a}_{j,t} &= (\mathbf{p}_{j,t} - \hat{\mathbf{x}}_t) - (\mathbf{p}_{j,t} - \mathbf{x}_t) \\ &= \mathbf{x}_t - \hat{\mathbf{x}}_t \\ \implies \|\hat{\mathbf{a}}_{j,t} - \mathbf{a}_{j,t}\|_2 &= \|\mathbf{x}_t - \hat{\mathbf{x}}_t\|_2 \\ &\leq kC_x e^{-\gamma H} \end{aligned}$$

544 Now, we argue that the loss incurred due to the noise in  $\hat{\mathbf{x}}_t$  is less than simply twice the change in cost  
 545 due to the error in  $\hat{\mathbf{a}}_{j,t}$ . Let  $\hat{j}^* := \arg \min_{j \in [p]} \{\|\hat{\mathbf{a}}_{j,t} - BM_t \tilde{\mathbf{w}}_t\|_2^2\}$ . Let  $j^*$  be defined analogously.  
 546 If  $j^* = \hat{j}^*$ , then the difference in cost is less than or equal to the extra loss incurred by the error in  $\hat{\mathbf{a}}$ .  
 547 If  $j^* \neq \hat{j}^*$ , then it is possible that the true ‘binding obstacle’ was biased away, and that the ‘guessed’  
 548 binding obstacle was ‘biased towards’; therefore, the cost error is possibly due to deviations up to  
 549 twice the error in the  $\hat{\mathbf{a}}_{j,t}$  vectors. This means that, defining  $\delta_t$  such that  $\|\delta_t\|_2 = 2\|\mathbf{x}_t - \hat{\mathbf{x}}_t\|_2$ , we  
 550 have that the following holds:

$$\begin{aligned} \Delta &= |c_t(\mathbf{x}_{t+1}^A, \tilde{\mathbf{u}}_t) - \ell_t(M_{t-H:t})| = \left| \min_{j \in [p]} \|\mathbf{a}_{j,t} + BM_t \tilde{\mathbf{w}}_t\|_2^2 - \min_{j \in [p]} \|\hat{\mathbf{a}}_{j,t} + BM_t \tilde{\mathbf{w}}_t\|_2^2 \right| \\ &\leq \max_{\delta_t: \|\delta_t\|_2 \leq 2kC_x e^{-\gamma H}} \left\{ \|(\hat{\mathbf{a}}_{j,t} + \delta_t) + BM_t \tilde{\mathbf{w}}_t\|_2^2 - \|\hat{\mathbf{a}}_{j,t} + BM_t \tilde{\mathbf{w}}_t\|_2^2 \right\} \\ &= \delta_t^T \delta_t + 2\delta_t^T \hat{\mathbf{a}}_{j,t} - 2\delta_t^T (BM_t \tilde{\mathbf{w}}_t) \\ &\leq \|\delta_t\|_2^2 + 2(C_x + \|\delta_t\|_2) \|\delta_t\|_2 + 2\|\delta_t\|_2 C_w \beta D_M \\ &= 3\|\delta_t\|_2^2 + 2C_x \|\delta_t\|_2 + 2C_w \beta D_M \|\delta_t\|_2 \\ &\leq 5C_x \|\delta_t\|_2 + 2C_w \beta D_M \|\delta_t\|_2 \\ &\leq 5(k^2 C_x^2 e^{-\gamma H} (1 + \beta D_M C_w)). \end{aligned}$$

551 Letting  $H = \lceil \gamma^{-1} \log(5k^2 C_x (1 + \beta D_M C_w) T) \rceil$ , we have that

$$\Delta \leq \frac{C_x}{T}.$$

552  
 553

554 **Remark 3. Recursive Definition of  $H$  and  $C_x$ :**

555 *Currently, there is a recursive nature to the definition of  $H$  and  $C_x$ :  $H :=$*   
 556  *$\lceil \gamma^{-1} \log(5k^2 C_x(1 + \beta DC_w)T) \rceil$  and  $C_x := \frac{2\beta H DC_w}{\gamma}$ . However, this is not problematic because*  
 557 *the definitions will have a solution (that can be found efficiently); namely:*

$$\begin{aligned} H &\geq c_1 \log(c_2 C_x) \\ C_x &= k_1 H \end{aligned}$$

$$\implies H \geq c_1 \log(c_2 k_1 H)$$

558 *And for any  $c_1, c_2, k_1 \in \mathbb{R}^+$  and fixed  $T > 0$ , there exists a positive integer  $H$  such that the above*  
 559 *result holds (e.g., following from the fact that  $\log H = o(H)$ ). Further, the resulting  $H$  will not be*  
 560 *too large wrt  $T$  for sufficiently large  $T$  (e.g., large enough  $T$  to overcome the constants).*

## 561 A.5 Finalizing the Regret Bound

### 562 A.5.1 Apply Nonconvex Memory Follow-the-Perturbed-Leader

563 This result is from [38], Theorem 13 (Corollary 14 gives an equivalent result to our setting in the  
 564 asymptotic regret behavior; our optimal choice of  $\eta$  and  $\epsilon$  differs slightly).

### 565 A.5.2 Completing the Bound

566 Finally, we use Alg. 1 (which acts as an efficient  $\epsilon$ -oracle) with an approximate trust region imple-  
 567 mentation of our desired optimization problem (Alg. 2) acting as a subroutine, in order to compose  
 568 the regret components into a complete bound.

$$\begin{aligned} \text{Regret}(\mathcal{A}) &:= \max_{M \in \Pi} \sum_{t=H}^T c_t(x_t^M, \tilde{u}_t(M)) - \sum_{t=H}^T c_t(x_t^{\mathcal{A}}, \tilde{u}_t(\mathcal{A})) \\ &\leq \max_{M \in \Pi} \sum_{t=H}^T (f_t(M, M, \dots, M) + \frac{C_x}{T}) - \sum_{t=H}^T (f_t(M_{t-H:t}) + \frac{C_x}{T}) \\ &= \left[ \max_{M \in \Pi} \sum_{t=H}^T f_t(M, M, \dots, M) - \sum_{t=H}^T f_t(M_{t-H:t}) \right] + \mathcal{O}(\log T) \\ &\leq \tilde{\mathcal{O}}(\text{poly}(\mathcal{L})\sqrt{T}) \end{aligned} \tag{13}$$

569 To clarify the steps: the second line incorporates the approximation error from Section A.4.2 (which  
 570 is logarithmic in  $T$ , as noted in the third line) and the final line follows from the Nonconvex Memory  
 571 FPL result of [38].

## 572 B Convex-Concave Game: Algorithm and Correctness

573 For completeness and easier reference, we include a copy of Alg. 1 below. To improve clarity,  
 574 references to equations within this section (Supp. B) will use their numbering as given in Supp. B,  
 575 rather than in the main text. The key technical results of this section are to demonstrate: (1) that  
 576 Alg. 2 is a trust region instance that can be solved efficiently, and (2) that the optimization procedure  
 577 in Eqn. 15 is solved correctly and efficiently by the trust region procedure Alg. 2. Given these results,  
 578 our obstacle avoidance algorithm will be computationally efficient and attain low regret.

---

### Algorithm 1 Online Learning for Obstacle Avoidance

---

**Input:** Partially observed obstacle positions  $\{\mathbf{p}_j^j\}_{j=1}^K$ , planning horizon  $L$ , history length  $H$ .  
**Input:** Full horizon  $T$ , algorithm parameters  $\{\eta, \epsilon, \lambda\}$ , initial state  $\mathbf{x}_0$ .  
**Input:** Open-loop plan:  $\tilde{\mathbf{u}}_t^o$  for  $t = 1, \dots, T$ .  
**Initialize:** Closed-loop correction  $M_0^{[1:H]}$ , fixed perturbation  $P_0 \sim \text{Exp}(\eta)^{d_u \times H d_w}$ .  
**Initialize:** Play randomly for  $t = \{0, \dots, H-1\}$ , observe rewards, states, noises, and obstacles.  
**for**  $t = H \dots T-1$  **do**  
 Play  $M_t^{[1:H]}$ , and observe state  $\mathbf{x}_{t+1}$  and obstacles  $\{\mathbf{p}_{t+1}^j\}_{j \in [k]_{t+1}}$ .  
 Reconstruct disturbance  $\mathbf{w}_t$  using observed  $\mathbf{x}_{t+1}$ .  
 Construct the reward function:

$$\ell_{t+1}(\tilde{M}_t^{[1:H]}) = \min_{j \in [k]} \left\{ \|\mathbf{x}_{t+1}^{\tilde{M}} - \mathbf{p}_{t+1}^j\|_2^2 \right\} - \|\mathbf{x}_{t+1}^{\tilde{M}}\|_Q^2 - \|\tilde{\mathbf{u}}_t^{\tilde{M}}\|_R^2. \quad (14)$$

Solve for  $M_{t+1}^{[1:H]}$  as the solution to:

$$\arg \max_{\|M^{[1:H]}\| \leq D_M} \left\{ \sum_{\tau=1}^{t+1} \ell_{\tau}(M^{[1:H]}) + \lambda(M^{[1:H]} \bullet P_0) \right\}. \quad (15)$$

**end for**

---



---

### Algorithm 2 (General) Hidden-Convex Formulation for Objective in Eqn. 9

---

**Input:** Set of vectors  $\{\mathbf{a}_j^{[\tau]}\}_{j=1, \tau=1}^{k, H_t}$ , matrix  $B$ , vectors  $\mathbf{b}, \mathbf{b}_0$ , time history  $H_t \leq t$   
**Input:** Iterations  $N$ , learning rate  $\eta$ , approx. error  $\epsilon$ , perturbation  $P_0$ , diameter  $D_M$ .  
**Initialize:** Vector  $\mathbf{c}_0^{[\tau]} = \frac{1}{k} \mathbb{1}^k$ ,  $\tau = 1, \dots, H_t$ .  
**for**  $n=0 \dots N$  **do**  
 (1) Solve for  $M_n$

$$M_n = \arg \max_{\|M\| \leq D_M} \left\{ \sum_{\tau=1}^{H_t} \sum_{j=1}^k \mathbf{c}_n(j)^{[\tau]} \|\mathbf{a}_j^{[\tau]} + B M \mathbf{b}^{[\tau]}\|_2^2 \right. \\ \left. - \|\mathbf{b}_0^{[\tau]} + B M \mathbf{b}^{[\tau]}\|_Q^2 - \|M \mathbf{b}^{[\tau]}\|_R^2 + \lambda(M \bullet P_0) \right\}. \quad (16)$$

(2) Update  $\mathbf{c}_{n+1}$

$$\mathbf{c}_{n+1}^{[\tau]} = \Pi_{\Delta_k} \left[ \mathbf{c}_n^{[\tau]} e^{-\eta \nabla_{\mathbf{c}} \left( \sum_j \mathbf{c}_n^{[\tau]}(j) \|\mathbf{a}_j^{[\tau]} + B M \mathbf{b}^{[\tau]}\|_2^2 \right)} \right], \forall \tau \in \{1, \dots, H_t\}. \quad (17)$$

**end for**

**return**  $M_N$

---

## 579 B.1 Non-convex Memory FPL for Obstacle Avoidance

580 Intuitively, Alg. 1 operates by updating the gain matrices  $M_{t+1}^{[1:H]}$  via counterfactual reasoning: *in*  
 581 *hindsight*, given the actual observed disturbances and obstacle locations, what gain matrices *would*

582 have resulted in good performance (in terms of obstacle avoidance and the state-input penalties)? In  
 583 Supp. A, we demonstrate that this algorithm results in low regret as formalized in Eqn. 5 of the main  
 584 text. For reference: Eqn. 9 (main text) corresponds to Eqn. 15 (Supp. B) henceforth; similarly, Eqn. 8  
 585 (main text) corresponds to Eqn. 14 (Supp. B).

## 586 B.2 Efficient Solution of Eqn. 15 (Part 1): Reduction of Alg. 2 to Trust Region Instance

587 We now prove that Alg. 2 does indeed solve Eqn. 9. Consider the relaxed optimization problem

$$\max_{M \in \mathcal{M}} \sum_{\tau=1}^{H_t} \sum_j \lambda_j^{[\tau]} \|\mathbf{a}_j^{[\tau]} + BM\mathbf{b}^{[\tau]}\|_2^2 \quad (18)$$

588 We will first describe some useful quantities and (physically-motivated) assumptions. The physical  
 589 quantities of interest have the following characteristics:  $\mathbf{x} \in \mathbb{R}^{d_x}$ ,  $\mathbf{u} \in \mathbb{R}^{d_u}$ , and  $\mathbf{w} \in \mathbb{R}^{d_w}$ .

590 **Assumption 4.**  $B \in \mathbb{R}^{d_x \times d_u}$ , with  $d_u \leq d_x$ , and  $\text{rank}(B) = d_u$ . This corresponds to the following  
 591 physical assumptions: (1) there are no more inputs than states, and (2) there are no ‘extraneous’  
 592 inputs (if there are such inputs, then we can find a minimal realization of  $B$  and wlog set extraneous  
 593 inputs to always be zero). Similarly, if (1) fails, then we can remove extraneous inputs by again  
 594 setting them equal to zero uniformly (just as in (2)).

595 The dimension of several other variables of interest are:  $\mathbf{b} \in \mathbb{R}^{Hd_w}$  and for the decision variable  $M$ ,  
 596  $M \in \mathbb{R}^{d_u \times Hd_w}$ . We want to show that the optimization in Eqn. 18 is equivalent to a convex trust  
 597 region problem, which is efficiently solvable.

598 Further, let the quantity  $B^T B$  have a singular value decomposition denoted by:

$$B^T B = U^T \Lambda U.$$

600 We see that this decomposition has an orthogonal  $U \in \mathbb{R}^{d_u \times d_u}$  and positive definite  $\Lambda$  because  
 601  $\text{rank}(B) = d_u$  and thus the symmetric  $B^T B \in \mathbb{R}^{d_u \times d_u}$  has  $B^T B \succ 0$ .

602  
 603 Now, consider the problem of Eqn. 18, assuming that  $\forall \tau \in \{1, \dots, H_t\}$ , there are fixed  $\lambda^{[\tau]} \in$   
 604  $\Delta_p$ ,  $B$ ,  $\{\mathbf{a}_j^{[\tau]}\}_{j=1}^k$ ,  $\mathbf{b}^{[\tau]}$ . For now, choose a single time element, notated as  $[i]$ . For simplicity, we  
 605 will only include this notation at the beginning and end, where we sum the result back together. We  
 606 rearrange the objective for this case as follows:

$$\begin{aligned} \text{OBJ}_{\text{partial}} &= \sum_j \lambda_j^{[i]} \|\mathbf{a}_j^{[i]} + BM\mathbf{b}^{[i]}\|_2^2 \\ &= \sum_j \lambda_j (\mathbf{a}_j + BM\mathbf{b})^T (\mathbf{a}_j + BM\mathbf{b}) \\ &= \sum_j \lambda_j (\mathbf{a}_j^T \mathbf{a}_j + 2\mathbf{a}_j^T BM\mathbf{b} + \mathbf{b}^T M^T B^T BM\mathbf{b}) \\ &\equiv \sum_j \lambda_j (2\mathbf{c}_j^T M\mathbf{b} + \mathbf{b}^T M^T U^T \Lambda U M\mathbf{b}) \end{aligned}$$

607 Here, we are searching for the argmax  $M^*$ , so the  $\mathbf{a}_j^T \mathbf{a}_j$  is irrelevant. Further, we have defined  
 608  $\mathbf{c}_j^T = \mathbf{a}_j^T B$ . Now, let  $M_r := UM$ , and decompose  $M_r = [\mathbf{m}_1^T; \mathbf{m}_2^T; \dots; \mathbf{m}_{d_u}^T]$ . The optimization

609 objective is now:

$$\begin{aligned}
\text{OBJ}_{\text{partial}} &= \sum_j \lambda_j \|\mathbf{a}_j + BM\mathbf{b}\|_2^2 \\
&\equiv \sum_j \lambda_j (2\mathbf{c}_j^T M\mathbf{b} + \mathbf{b}^T M^T U^T \Lambda U M \mathbf{b}) \\
&= \sum_j \lambda_j (2\mathbf{c}_j^T M\mathbf{b} + \mathbf{b}^T M_r^T \Lambda M_r \mathbf{b}) \\
&= [\sum_j \lambda_j (2\mathbf{c}_j^T M\mathbf{b})] + \mathbf{b}^T M_r^T \Lambda M_r \mathbf{b}
\end{aligned}$$

610 The last simplification follows from the fact that  $\sum_j (\lambda_j) = 1$  (because  $\lambda \in \Delta_{d_u}$ ). Now, using our  
611 knowledge of the diagonal nature of  $\Lambda$  and the column partition of  $M_r$ , we can see that

$$M_r^T \Lambda M_r = \sum_{j=1}^{d_u} \sigma_j^2 \mathbf{m}_j \mathbf{m}_j^T$$

612 Substituting into the OPT formulation, we can further simplify all the way to the desired form:

$$\begin{aligned}
\text{OBJ}_{\text{partial}} &= \sum_i \lambda_i \|\mathbf{a}_i + BM\mathbf{b}\|_2^2 \\
&\equiv \left[ \sum_i \lambda_i (2\mathbf{c}_i^T M\mathbf{b}) \right] + \mathbf{b}^T M_r^T \Lambda M_r \mathbf{b} \\
&= \left[ \sum_i \lambda_i (2\mathbf{c}_i^T M\mathbf{b}) \right] + \mathbf{b}^T \left( \sum_{j=1}^{d_u} \sigma_j^2 \mathbf{m}_j \mathbf{m}_j^T \right) \mathbf{b} \\
&= \left[ \sum_i \lambda_i (2\mathbf{c}_i^T U^T M_r \mathbf{b}) \right] + \left( \sum_{j=1}^{d_u} \sigma_j^2 \mathbf{b}^T \mathbf{m}_j \mathbf{m}_j^T \mathbf{b} \right) \\
&= 2 \left[ \sum_i \lambda_i \left( \sum_j \tilde{c}_{i,j} \mathbf{m}_j^T \mathbf{b} \right) \right] + \left( \sum_{j=1}^{d_u} \sigma_j^2 \mathbf{m}_j^T \mathbf{b} \mathbf{b}^T \mathbf{m}_j \right) \\
&= \sum_j \left[ \left( 2 \sum_i \lambda_i \tilde{c}_{i,j} \right) \mathbf{b}^T \right] \mathbf{m}_j + \left( \sum_{j=1}^{d_u} \mathbf{m}_j^T (\sigma_j^2 \mathbf{b} \mathbf{b}^T) \mathbf{m}_j \right) \\
&= \mathbf{m}^T P \mathbf{m} + \mathbf{p}^T \mathbf{m}.
\end{aligned}$$

613 where  $\mathbf{m}$  is a vector concatenation of the transposed rows of  $M_r$ . Now, to combine the results over  
614 time, utilizing the convexity-preserving property of function addition, we simply reintroduce the  
615  $[i]$ -indexing and sum:

$$\begin{aligned}
\text{OBJ}_{\text{partial}} &= \sum_j \lambda_j^{[i]} \|\mathbf{a}_j^{[i]} + BM\mathbf{b}^{[i]}\|_2^2 \\
&= \mathbf{m}^T P^{[i]} \mathbf{m} + (\mathbf{p}^{[i]})^T \mathbf{m} \\
\implies \text{OBJ}_{\text{full}} &= \sum_i \sum_j \lambda_j^{[i]} \|\mathbf{a}_j^{[i]} + BM\mathbf{b}^{[i]}\|_2^2 \\
&= \sum_i \mathbf{m}^T P^{[i]} \mathbf{m} + (\mathbf{p}^{[i]})^T \mathbf{m} \\
&= \sum_i \mathbf{m}^T P \mathbf{m} + \mathbf{p}^T \mathbf{m}
\end{aligned}$$

616 Once we solve for  $\mathbf{m}^*$  using a trust region solver, we unpack it into  $M_r^*$ , and get  $M^* = U^T M_r^* (=$   
617  $U^T (U M^*) = M^*)$  as desired. Further, we can translate a norm bound on  $M$  into an equivalent one  
618 on  $\mathbf{m}$  (at least, for appropriate choice of norm bound - e.g., the Frobenius norm on  $M$  becomes the  
619 2-norm on  $\mathbf{m}$ ).

### 620 B.3 Solving the FPL Sub-Problem

621 In order to feasibly engage the obstacle avoidance algorithm, it is necessary to solve for optimal  
 622 solutions to the objective in Eqn. 15, which is an instance of the following max-min problem:

$$\begin{aligned} \arg \max_{\|M\| \leq D_M} \sum_{\tau=1}^{t+1} \min_j & \| \mathbf{a}_j^{[\tau]} + BM\mathbf{b}^{[\tau]} \|_2^2 - \| \mathbf{b}_0^{[\tau]} + BM\mathbf{b}^{[\tau]} \|_Q^2 - \dots \\ & \dots - \| M\mathbf{b}^{[\tau]} \|_R^2 + \lambda(M \bullet P_0), \end{aligned}$$

623 where  $\mathbf{a}_j^{[\tau]}$ ,  $B$ ,  $\mathbf{b}_0^{[\tau]}$ ,  $\mathbf{b}^{[\tau]}$  depend on the dynamics (Eqn. 4, main text) and the obstacle locations. The  
 624 resulting algorithm is shown in Alg. 2, which converges to  $M_{t+1}^{[1:H]}$  in Eqn. 15 of Alg. 1.

625 Finally, we need to demonstrate that Alg. 2 will converge to a pair  $\{\mathbf{c}_N, M_N\}$  that corresponds to the  
 626 optimal solution of Eqn. 15. This follows immediately from Theorem 7, Part II of [61]. We have an  
 627 instance of a repeated game in which an optimization oracle efficiently solves Eqn. 16, and then the  
 628 low-regret exponentiated gradient algorithm [62] iteratively updates  $\mathbf{c}_n$  (Eqn. 17). Again, we utilize  
 629 the fact that the operation of function addition preserves, respectively, the convexity and concavity  
 630 properties of pairs of operand functions as a necessary tool to allow for the results to still hold when  
 631 applying the summation over time steps.

### 632 B.4 Efficient Solution of Eqn. 15 (Part 2): Reduction of Obstacle Avoidance to Alg. 2

633 This proof works as a reduction, where we show that the obstacle avoidance problem (Eqn. 15)  
 634 constitutes a particular set of inputs to the general formulation of Alg. 2. Recall that at time  $t$ , the  
 635 algorithm  $A$  has access to the state trajectory  $\{\mathbf{x}_\tau^A\}_{\tau=1}^t$ , the disturbance history  $\{\mathbf{w}_\tau\}_{\tau=1}^{t-1}$ , and the sets  
 636 of sensed obstacles  $\{\mathbf{p}_\tau^j\}_{\tau=1}^t$ . For any  $\tau \in \{H, \dots, t\}$ , the loss function can be written as an instance  
 637 of Alg. 2. Specifically, let  $\mathbf{a}_\tau^j = \tilde{A}\mathbf{x}_{\tau-1} + D\mathbf{w}_{\tau-1} - \mathbf{p}_\tau^j$ ,  $\mathbf{b}_\tau = \mathbf{w}_{\tau-H:\tau-1}$ ,  $\mathbf{b}_{0,\tau} = \tilde{A}\mathbf{x}_{\tau-1} + D\mathbf{w}_{\tau-1}$ .  
 638 Then, for an appropriate  $\mathbf{c}_\tau \in \Delta_{k_\tau}$ , the optimization problems are equivalent. Concatenating over the  
 639  $\tau$ -formulations, we have an instance of Eqn. 16. Specifically, for some choice of  $\mathbf{c}$ , we will have an  
 640 equivalent problem as Eqn. 15; here  $\mathbf{c}$  is an encoding – unknown *a priori* – of the relevant (nearest)  
 641 obstacles at each time step.



## 642 C Hardware Experiment Details

### 643 C.1 Equations of Motion

644 The equations of motion for the high-level Go1 control are:

$$\begin{bmatrix} x_{t+1} \\ y_{t+1} \\ \psi_{t+1} \end{bmatrix} = \begin{bmatrix} x_t \\ y_t \\ \psi_t \end{bmatrix} + dt \begin{bmatrix} \cos \psi & 0 \\ \sin \psi & 0 \\ 0 & 1 \end{bmatrix} \begin{bmatrix} u_x \\ u_\psi \end{bmatrix} + \begin{bmatrix} w_{x,t} \\ w_{y,t} \\ w_{\psi,t} \end{bmatrix}, \quad (19)$$

645 where  $u_x$  is the commanded forward velocity and  $u_\psi$  is the commanded yaw rate. The disturbances  
646  $w_x, w_y$  and  $w_\psi$  capture unmodeled disturbances including imperfect velocity tracking by the robot's  
647 low-level controller and deviations due to localization noise.

### 648 C.2 Boschloo Test for Significance

649 In order to evaluate the improvement of OLC vs A\* in our hardware experiments, we perform a  
650 Boschloo Exact Test on the outcomes of the experiment. This test (for our purposes) essentially  
651 provides a statistical evaluation of the difference in means of two Bernoulli variables in the small-data  
652 regime. In our experiments, we have a 2x2 test matrix in which OLC and A\* are each run 21 times,  
653 with the number of failures a random variable depending on each algorithm's behavior subject to the  
654 realized obstacle layouts. While we do not claim that our distribution of layouts exactly matches the  
655 'true distribution in the world,' we believe it to be similar enough such that the statistic should be  
656 meaningful here.

657 To be precise, the statistic encapsulates the probability, in the null hypothesis that the two means are  
658 equal (or that one mean is greater), of achieving a small sample of realizations that is *more extreme*  
659 than that observed in the true data. By choosing the alternative hypothesis "collision rate of A\* is  
660 higher," a significant result (say, at  $\alpha = 10\%$  or  $\alpha = 5\%$  significance) would mean that we reject the  
661 null hypothesis. This, then, would provide evidence that the use of OLC meaningfully reduced the  
662 collision rate.

663 Using the existing scipy implementation (scipy.stats.boschloo\_exact), we find that for the data  
664 presented in Table 2, the test statistic is 0.1073 with  $p = 0.074$ , indicating significance at  $\alpha = 0.1$   
665 but not  $\alpha = 0.05$ . Though not conclusive, this provides reasonable evidence that the reported  
666 improvement in the collision rate is not due to random chance in the obstacle layout realizations.

### 667 C.3 Obstacle Layouts

668 We provide a bird's eye view of the layout configurations used during the experiments in Figure 3.  
669 Additionally see the supplementary video for the physical instantiation of the layouts used in the  
670 experiments.

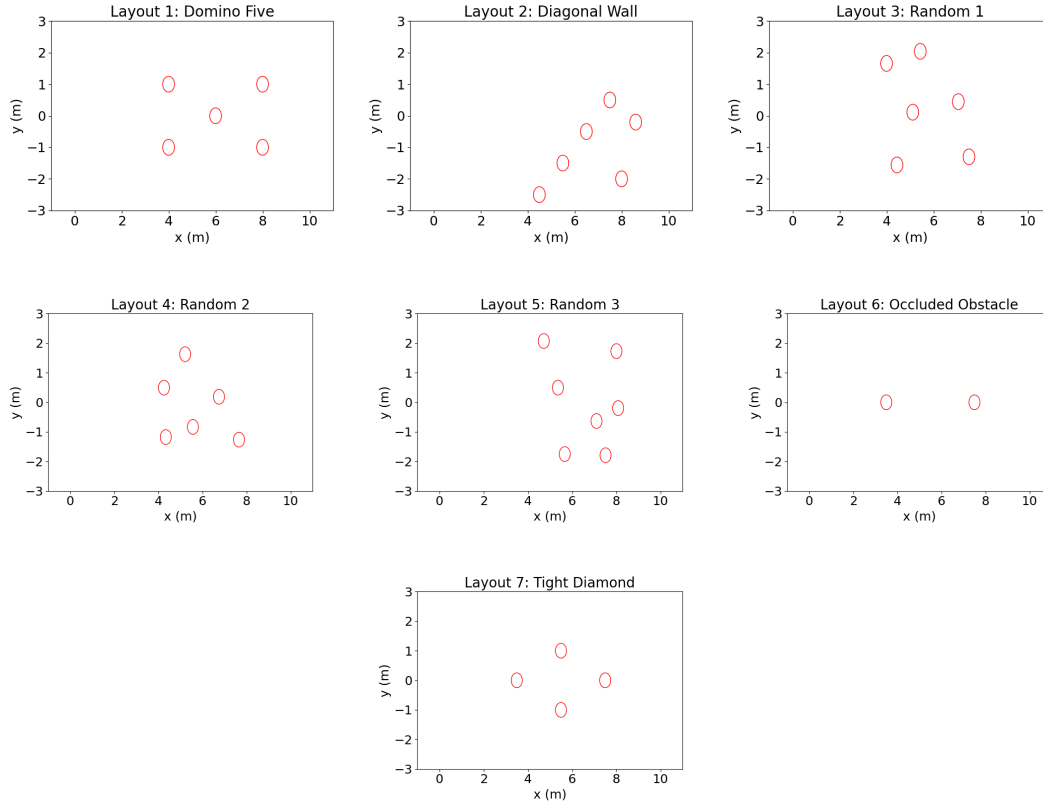

Figure 3: Obstacle layouts from a bird's eye view used during the experiments. Obstacles are denoted by the red circles. The quadruped was placed at (0, 0) and tasked with traversing 10m in the the x direction.

## D Simulation Details and Resources

### D.1 Simulation Implementation: Parameters, Setup, and Runtime

In this section, we report the hyperparameters used for the experiments results in the main text. We implemented our algorithm and environments in JAX. All experiments were carried out on a single CPU in minutes.

We set the full horizon  $T$  to 100 and the history length  $H$  to 10. For random perturbation across environments, we sample noise from Gaussian distribution with mean 0 and standard deviation 0.5. For directional perturbation, we sample Gaussian noise with mean 0.5 and standard deviation 0.5. A random seed of 0 is used for all experiments. We obtain the nominal control from LQR with  $Q$  set to 0.001 and  $R$  set to 1. We then learn the residual obstacle-avoiding parameter  $M$  via gradient descent. The learning rate of gradient descent is 0.008 in the centerline environment and is 0.001 for the other environments.

An important note for these experiments: we do not implement existing heuristic techniques like obstacle padding to improve the RRT\* collision-avoidance performance. As such, this performance is not meant to suggest that RRT\* *cannot* work robustly in these settings, only that its nominal (and theoretically grounded) form does not account for disturbances or uncertainty and is therefore “optimistic” as compared to HJ methods, etc.

### D.2 Additional Figures and Trajectories – Centerline Environment

This appendix includes sample trajectories and other relevant visualizations for each algorithm.

#### D.2.1 RRT\* / A\*

Here, we demonstrate some sample paths for RRT\* in each disturbance regime. Fig. 4 shows uniform random noise, Fig. 5 shows sinusoidal noise, and Fig. 6 shows adversarial noise. In each case, the shift at the final time (goal position, top of image) causing a horizontal shift in the path should be ignored.

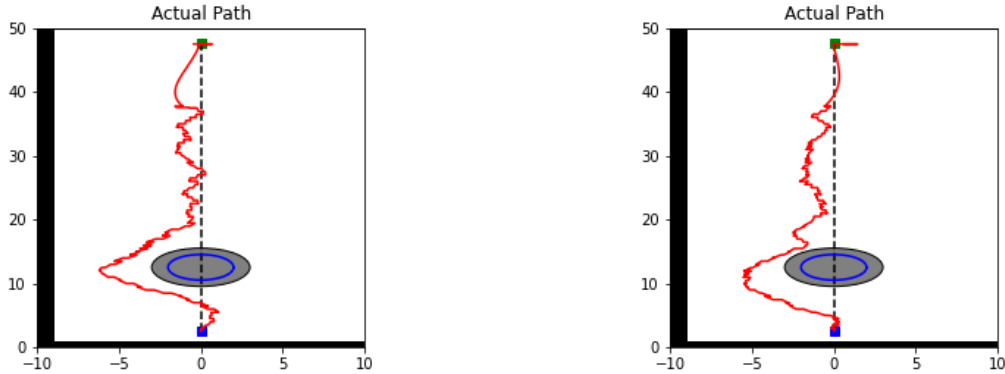

Figure 4: RRT\* Planner trajectories against uniform random disturbances. Obstacle is the gray sphere, with the nominal trajectory a dashed black (vertical) line.

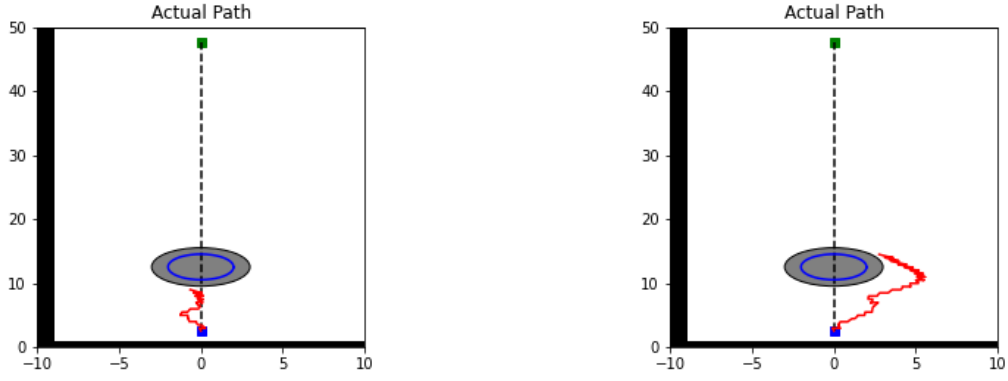

Figure 5: RRT\* Planner trajectories against sinusoidal disturbances. Obstacle is the gray sphere, with the nominal trajectory a dashed black (vertical) line.

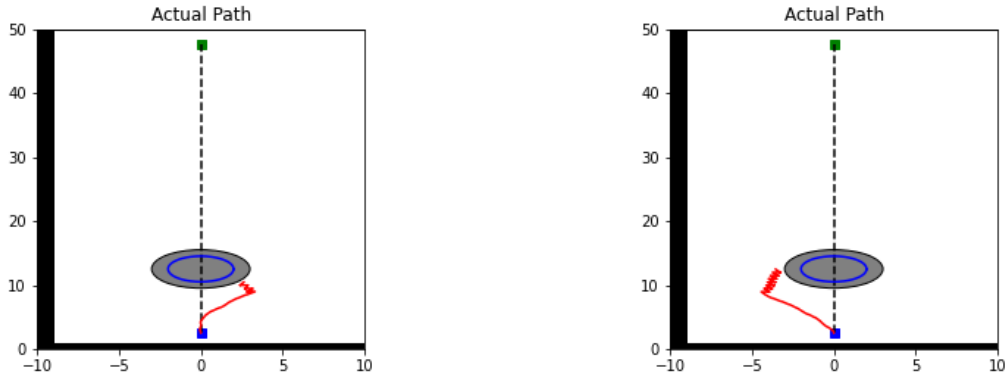

Figure 6: RRT\* Planner trajectories against adversarial disturbances. Obstacle is the gray sphere, with the nominal trajectory a dashed black (vertical) line.

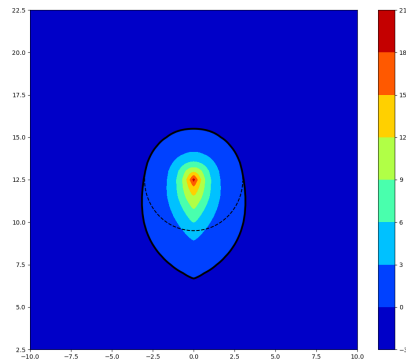

Figure 7: Racer backwards reachable set (inside thick black line) and the obstacle (dashed black line).

## 696 D.2.2 HJ Reachability Planner

697 For the centerline example, the HJ Reachability planner constructs in Fig. 7 the backwards-reachable  
 698 set for a given obstacle (dashed line), subject to the dynamics constraints imposed on the racer.

699 Note that every positive-value region denotes an unsafe region. The interpretation is that there is a  
700 “pseudo-cone” in front of the obstacle from which the vehicle cannot escape hitting the obstacle *if the*  
701 *disturbances are sufficiently adversarial*. Note that this means that HJ planning is independent of the  
702 *actual* disturbances. For each of the disturbance patterns (random, sinusoid, adversarial), we plot  
703 a collapsed view of sample trajectories around an obstacle for the HJ planner in Fig. 8. Note how  
704 similar each plot is, due to this independence of the control from the actual observed disturbances.

### 705 D.2.3 Online Learned Planner

706 The key illustration here is that the trajectories of the online planner follow the structure of the  
707 disturbances, as illustrated by the following comparison of the uniform random and sinusoidal  
708 disturbances in Fig. 9 and Fig. 10.

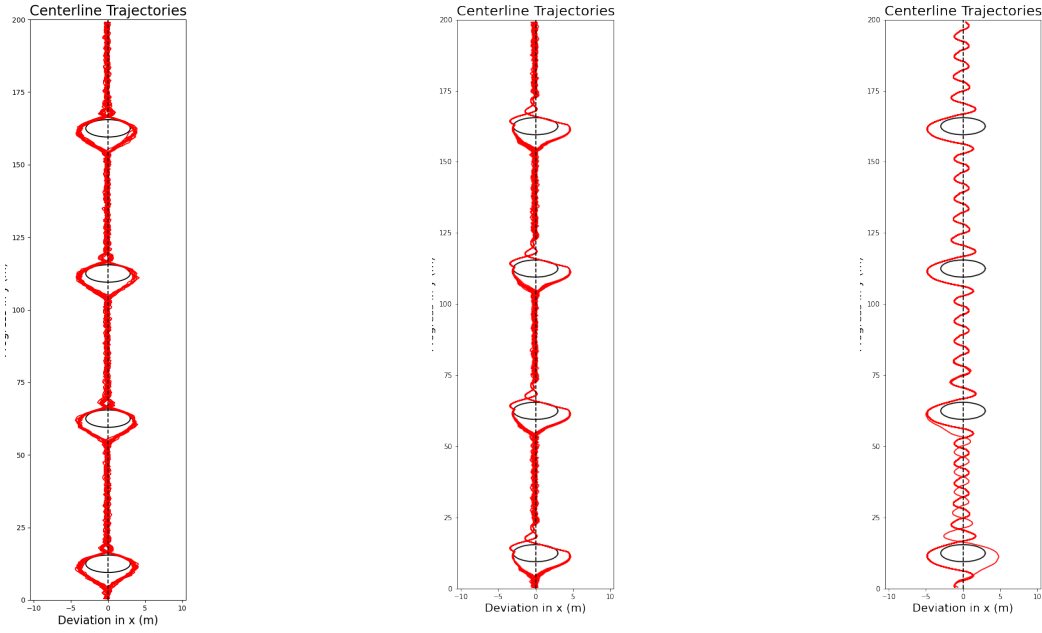

Figure 8: HJ Planner trajectories against (L) uniform random, (C) sinusoid, and (R) adversarial disturbances. Obstacles are black spheres, with the nominal trajectory a dashed black (vertical) line.

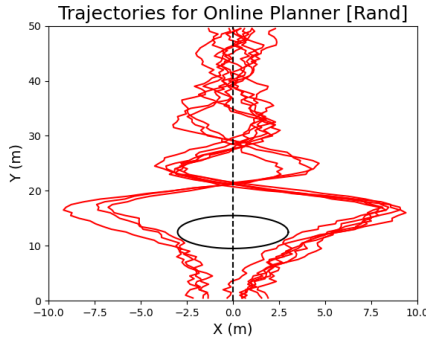

Figure 9: Collapsed trajectories of the racer using the online planner with random disturbances. The racer passes on each side evenly.

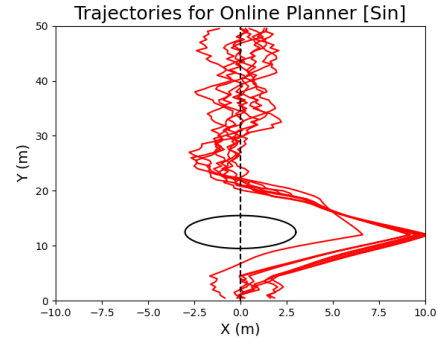

Figure 10: Collapsed trajectories of the racer using the online planner with sin disturbances. The racer learns to pass on the right.

### D.3 Failures in the Slalom Setting

We include an image of the four major environments in Fig. 11. Our simulated performance was strong in all environments except for the slalom environment, which we discuss further below.

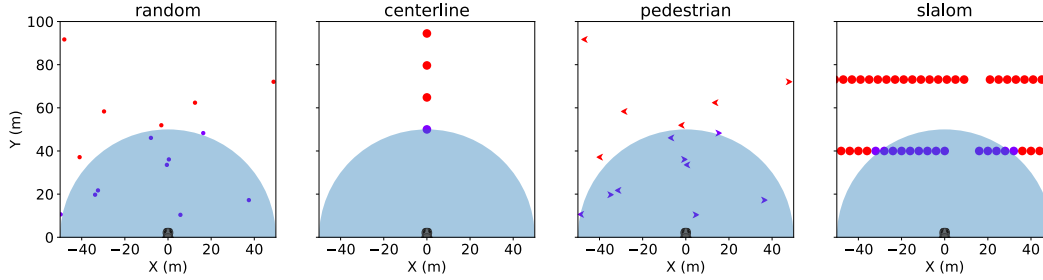

Figure 11: Illustration of the four environments used as a proof-of-concept for our Online algorithm.

The “slalom” setting allows us to tune its difficulty by varying the x-position (i.e. offset) of the gates or by narrowing their width. Fig. 12 illustrates the effect of increasing gate offset from center (i.e., error in the nominal planned trajectory – x-axis) and decreasing gate width (i.e., greater sensitivity to disturbances – y-axis) on failure rate through the slalom gates. As expected, reduced gate width and increased offset broadly increase failure rates. This is due to the online planner being forced to overcome a poor nominal planned trajectory; in combination with the gated passageways, this requires very precise sequences of inputs and a longer memory of previously observed gates (due to the limited sensing horizon). This is discussed further in Supp. D.3.1.

#### D.3.1 Discussion

The first answer is relatively direct: in all of our examples, we are implicitly acting in a kind of Frenet frame, where all obstacle positions and other referencing is to the ego vehicle (racer) position. As such, the nominal planned trajectory can always be thought of as mapped to a straight line ahead of the racer. In this context, some slalom gates represent a 20m deviation *from the nominal trajectory*. However, this flies in the face of the central modeling intuition of the online framework – that obstacle avoidance is local, with local sensing, local deviations from the nominal trajectory, and “reactive” control to disturbances as they arise. In this vein, the nominal slalom is a challenging task, precisely because it stretches the limits of what can be met by our setup. Concretely: limited sensing makes each slalom wall a kind of “gradient-less” observation (shifting left and right yields only a continuation of the wall *unless the gap is already sensed*), meaning that choosing the correct Left/Right action is difficult. Additionally, the map displays memory, because going the wrong way early through one gate can render the next gate infeasible.

It is in light of these considerations that we argue that the slalom case is actually a case for our model, because it interpretably creates a setting in which the key assumptions are broken. Just like an actual skier who overshoots through one gate and cannot recover for the next gate, so too does our obstacle avoidance algorithm run the risk of “dooming” itself due to a wrong turn – but this is, as described, fundamental to the hardness of the obstacle avoidance problem! As such, we consider the slalom gate as a fundamentally hard problem, and consider a case for future work a fuller characterization of how our planner works for slaloms of varying difficulty, as measured by the sensor range, the distance between gates (both laterally and longitudinally), and the fundamental “cost memory” as it depends on these and other parameters.

#### D.3.2 Experimental Parameter Sweep – Slalom Course

In an effort to better represent the effects of the slalom setting and the dependence on gate width and offset, Fig. 12 illustrates the effect of increasing gate offset from center (i.e., error in the nominal planner trajectory – x-axis) and decreasing gate width (i.e., greater sensitivity to disturbances – y-axis)

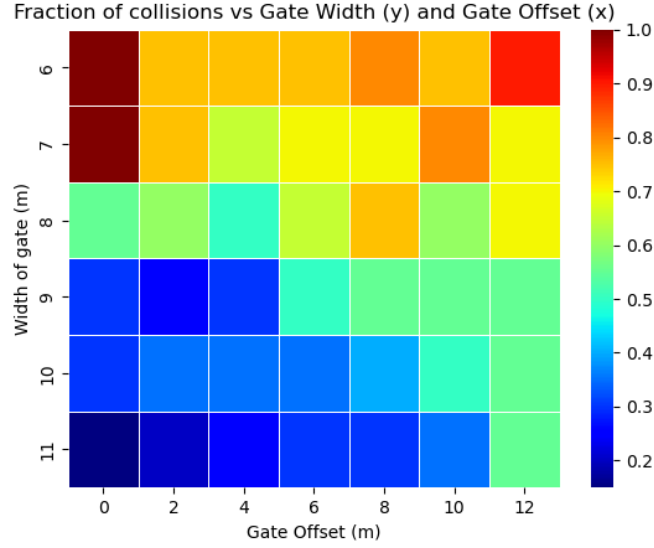

Figure 12: Failure rate heatmap for increasing gate offset (left to right) and decreasing gate width (bottom to top). As expected, failure increases with narrower gates (top) and larger offsets (right).

on failure rate through the slalom gates. As expected, reduced gate width and increased offset broadly increase failure rates.

We note that for narrow gates, a zero-offset slalom is actually quite challenging to ensure - we believe this is due to the fundamental  $H_\infty$  limit of stabilization of disturbances for this system; namely, a too-narrow gate requires too-strong robustness about the setpoint (origin), causing failure. This also explains why failure rates are high but not one for moderate offsets in the narrow-gate environment as well: specifically, they allow some freedom away from the zero-offset regularization problem. Besides this, the trend quite clearly demonstrates the fundamental increases in difficulty observed for narrower gates and larger offsets, as expected.
